# Supplementary material
Source: PubMed Central journal article supplement (PMC2843231)
Supplement: supp_M109.078568_Supplegend.pdf [file supp_M109.078568_Supplegend.pdf]

**Supplementary Figure 1.** Full length Nav1.1 protein is detected in R1648H mutants. Western blot analysis detected only the expected 260 kDa Nav1.1 protein band in mutants and wild-type mice. WT, wild-type; RH/+, *Scn1ARH/+*; RH/RH, *Scn1ARH/*
