# Supplementary material
Source: PubMed Central journal article supplement (PMC2843231)

Figure S1

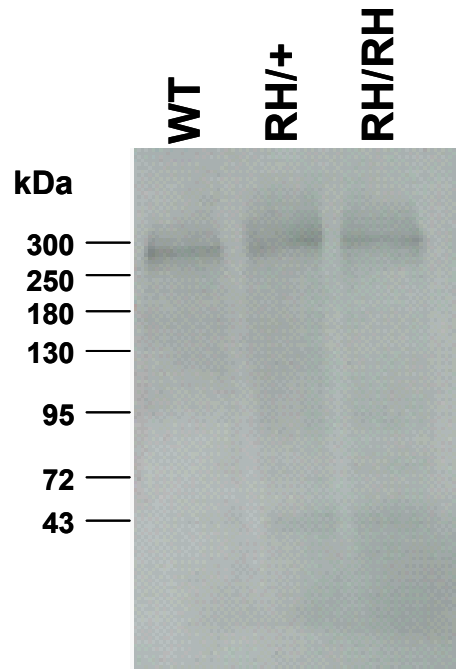

Supplement: supp_M109.078568_jbc.M109.078568-1.pdf [file supp_M109.078568_jbc.M109.078568-1.pdf]
